# Supplementary material
Source: Research Square preprint supplement (doi:10.21203/rs.3.rs-9098848/v1)
Supplement: Supplementary file 1 [file 468404a1b5ebe12488bb3467.docx]

**Survey on the prevalence of premenstrual syndrome (PMS) among Hong Kong Female Athletes**

**Section 1. Consent**

The Sports Nutrition and Monitoring Centre (SNM) is planning a research project to examine the prevalence of premenstrual syndrome (PMS) among female athletes in Hong Kong. Female adult athletes at the Hong Kong Sports Institute (HKSI) are invited to participate in this study. The study aims to explore premenstrual syndrome (PMS) among female athletes in Hong Kong aged 18 and above. It also seeks to examine individual factors, such as anthropometric measurements, vitamin D intake, sunlight exposure, and the types of sports, as potential contributors to PMS.

Participant will complete a specially designed questionnaire. The questionnaire contained questions on socio-demographic information, sunlight exposure, food frequency questionnaire (FFQ) for assessment of dietary vitamin D intake (FFQ), and the Premenstrual syndrome scale (PMSS). Subsequently, anthropometric data (i.e. body weight, height and body fat percentage) will be measured using tape and bioelectrical impedance analysis. All information obtained will be used for research purposes only and will be kept confidential. Participant will not be identified by name in any report of the completed study. The reason why the athlete identification number required in the questionnaire is to provide the relevant information to dietitians from HKSI for follow-up if the participants with moderate or high risks of PMS has been identified (PMSS ≥ 81). Any data containing personal identifiers will be kept for 3 years and will be deleted afterwards. Participation is entirely voluntary. This means that you can choose to stop at any time without negative consequences.

For any inquiries regarding the research, you are encouraged to reach out to Mr. Cheung Chi Man, Leo, via internal telephone extension 417 or by email at [leoc@hksi.org.hk](mailto:leoc@hksi.org.hk).

1. I understand the procedures described above and agree to participate in this study, and agree to provide the Athlete ID number

○ Yes

○ No

**Section 2. Personal Information**

1. Athlete’s Sports Medicine Centre ID number

_________________________________________________

1. How old are you?

_________________________________________________

1. Country of Citizenship

_________________________________________________

1. What is the highest level of education you've completed?

○ Secondary school

○ Associate degree

○ University

○ Postgraduate qualification

○ Other

1. What type of athlete are you?
2. Athlete type?

○ Full-time athlete

○ Part-time athlete

**Section 3. The following questions about premenstrual syndrome**

Please respond to questions 8 through 10 based on the data from your last three menstrual cycles

1. Average days of menstrual bleeding

○ < 4 days

○ 4 – 7 days

○ > 7 days

1. Average duration of the menstruation cycle

○ < 21 days

○ 21 – 35 days

○ > 35 days

1. Average amount of menstrual flow

Note:

During the entire menstrual cycle:

Light flow is typically less than 25 ml or 2-6 regular pads/tampons

Moderate flow falls in between, with 25-80 ml or 7-15 regular pads/tampons

Heavy flow is more than 80 ml or 16+ regular pads/tampons

○ Light

○ Moderate

○ Heavy

**Physiological symptoms**

Each of the symptoms below, tick the number that most closely describes the intensity of your premenstrual symptoms during your last cycle. These are symptoms that would occur during the premenstrual phase of your cycle.

This phase begins about seven days prior to menstrual bleeding (or seven days before your period) and ends about the time bleeding starts. Rate each item on this list on a scale from 1 (not present or no change from usual) to 5 (extreme change, perhaps noticeable even to casual acquaintances).

|  | Never  (1) | Rarely  (2) | Sometimes (3) | Often  (4) | Always  (5) |
| --- | --- | --- | --- | --- | --- |
| Breast tenderness and swelling |  |  |  |  |  |
| Abdominal bloating |  |  |  |  |  |
| Weight gain |  |  |  |  |  |
| Headache |  |  |  |  |  |
| Dizziness/ fainting |  |  |  |  |  |
| Fatigue |  |  |  |  |  |
| Palpitations |  |  |  |  |  |
| Pelvic discomfort and pain |  |  |  |  |  |
| Abdominal cramps |  |  |  |  |  |
| Change in bowel habits |  |  |  |  |  |
| Increased appetite |  |  |  |  |  |
| Generalized aches and pains |  |  |  |  |  |
| Food cravings (sugar/ salt) |  |  |  |  |  |
| Skin changes, rashes, pimples |  |  |  |  |  |
| Nausea/ Vomiting |  |  |  |  |  |
| Muscle and joint pain |  |  |  |  |  |

**Psychological symptoms**

Each of the symptoms below, tick the number that most closely describes the intensity of your premenstrual symptoms during your last cycle. These are symptoms that would occur during the premenstrual phase of your cycle. This phase begins about seven days prior to menstrual bleeding (or seven days before your period) and ends about the time bleeding starts. Rate each item on this list on a scale from 1 (not present or no change from usual) to 5 (extreme change, perhaps noticeable even to casual acquaintances).

|  | Never  (1) | Rarely  (2) | Sometimes (3) | Often  (4) | Always  (5) |
| --- | --- | --- | --- | --- | --- |
| Irritability |  |  |  |  |  |
| Anxiety |  |  |  |  |  |
| Tension |  |  |  |  |  |
| Mood swings |  |  |  |  |  |
| Loss of concentration |  |  |  |  |  |
| Depression |  |  |  |  |  |
| Forgetfulness |  |  |  |  |  |
| Easy crying/ crying spells |  |  |  |  |  |
| Sleep changes (Insomnia/Hypersomnia) |  |  |  |  |  |
| Confusion |  |  |  |  |  |
| Aggression |  |  |  |  |  |
| Hopelessness |  |  |  |  |  |

**Behavioural symptoms**

Each of the symptoms below, tick the number that most closely describes the intensity of your premenstrual symptoms during your last cycle. These are symptoms that would occur during the premenstrual phase of your cycle. This phase begins about seven days prior to menstrual bleeding (or seven days before your period) and ends about the time bleeding starts. Rate each item on this list on a scale from 1 (not present or no change from usual) to 5 (extreme change, perhaps noticeable even to casual acquaintances).

|  | Never  (1) | Rarely  (2) | Sometimes (3) | Often  (4) | Always  (5) |
| --- | --- | --- | --- | --- | --- |
| Social withdrawal |  |  |  |  |  |
| Restlessness |  |  |  |  |  |
| Lack of self-control |  |  |  |  |  |
| Feeling guilty |  |  |  |  |  |
| Clumsiness |  |  |  |  |  |
| Lack of interestin usualactivities |  |  |  |  |  |
| Poor judgment |  |  |  |  |  |
| Impaired workperformance |  |  |  |  |  |
| Obsessional thoughts  (Unpleasant or anxiety-inducing thoughts that are commonly regarded as irrational and unwarranted) |  |  |  |  |  |
| Compulsive behaviour (e.g. cleaning, inspecting  , collecting items, and  Organizing them) |  |  |  |  |  |
| Irrational thoughts  (Irrational thoughts are patterns of thinking that  lack logic and occur  without any negative emotions) |  |  |  |  |  |
| Being over-sensitive |  |  |  |  |  |

**Section 4. The following questions about body composition**

You can provide details about your body composition based on your most recent InBody report, as long as it was generated within the last month.

Height (cm)

_________________________________________________

Body weight (kg)

_________________________________________________

Fat mass (%)

_________________________________________________

Fat mass (kg)

_________________________________________________

Fat free mass (kg)

_________________________________________________

- END -
